# Supplementary material
Source: PubMed Central journal article supplement (PMC5064818)
Supplement: NIHMS821261-supplement-Supplementary_Figure_and_Tables.pdf [file NIHMS821261-supplement-Supplementary_Figure_and_Tables.pdf]

## Online Resource – Supplementary Figure and Tables

Anxiety is related to indices of cortical maturation in typically developing children and adolescents

### Brain Structure and Function

Erik Newman<sup>1,2</sup>, Wesley K. Thompson<sup>2,3</sup>, Hauke Bartsch<sup>4</sup>, Donald J. Hagler, Jr.<sup>4,5</sup>, Chi-Hua Chen<sup>2,4</sup>, Timothy T. Brown<sup>4,6</sup>, Joshua M. Kuperman<sup>4,5</sup>, Connor McCabe<sup>1,7</sup>, Yoonho Chung<sup>1,4,8</sup>, Ondrej Libiger<sup>9</sup>, Natacha Akshoomoff<sup>1,2</sup>, Cinnamon S. Bloss<sup>9</sup>, B. J. Casey<sup>10</sup>, Linda Chang<sup>11</sup>, Thomas M. Ernst<sup>11</sup>, Jean A. Frazier<sup>12</sup>, Jeffrey R. Gruen<sup>13</sup>, David N. Kennedy<sup>12</sup>, Sarah S. Murray<sup>14</sup>, Elizabeth R. Sowell<sup>15</sup>, Nicholas Schork<sup>9</sup>, Tal Kenet<sup>16</sup>, Walter E. Kaufmann<sup>17</sup>, Stewart Mostofsky<sup>18</sup>, David G. Amaral<sup>19</sup>, Anders M. Dale<sup>4,5,6,20</sup>, and Terry L. Jernigan<sup>1,2,5,20</sup> for the Pediatric Imaging, Neurocognition, and Genetics Study

<sup>1</sup>Center for Human Development, University of California, San Diego, La Jolla, CA

<sup>2</sup>Department of Psychiatry, University of California, San Diego, La Jolla, CA

<sup>3</sup>Stein Institute for Research on Aging, University of California, San Diego, La Jolla, CA

<sup>4</sup>Multimodal Imaging Laboratory, University of California, San Diego, La Jolla, CA

<sup>5</sup>Department of Radiology, University of California, San Diego, La Jolla, CA

<sup>6</sup>Department of Neurosciences, University of California, San Diego, La Jolla, CA

<sup>7</sup>Department of Psychology, University of Washington, Seattle, WA

<sup>8</sup>Department of Psychology, Yale University, New Haven CT

<sup>9</sup>Scripps Genomic Medicine, Scripps Translational Science Institute and Scripps Health, La Jolla, CA

<sup>10</sup>Sackler Institute for Developmental Psychobiology, Weil Cornell Medical College, New York, NY

<sup>11</sup>Department of Medicine, University of Hawaii and Queen's Medical Center, Honolulu, HI

<sup>12</sup>Department of Psychiatry, University of Massachusetts Medical School, Boston, MA

<sup>13</sup>Departments of Pediatrics and Genetics, Yale University School of Medicine, New Haven, CT

<sup>14</sup>Department of Pathology, University of California, San Diego, La Jolla, CA

<sup>15</sup>Department of Pediatrics, University of Southern California, Los Angeles, CA and Children's Hospital,  
Los Angeles, CA

<sup>16</sup>Department of Neurology and Athinoula A. Martinos Center for Biomedical Imaging, Massachusetts  
General Hospital, Charlestown, MA

<sup>17</sup>Boston Children's Hospital and Harvard Medical School, Boston, MA

<sup>18</sup>Kennedy Krieger Institute and Johns Hopkins University School of Medicine, Baltimore MD

<sup>19</sup>Department of Psychiatry and Behavioral Sciences, University of California – Davis, Davis, CA

<sup>20</sup>Department of Cognitive Science, University of California, San Diego, La Jolla, CA

Corresponding Author:

Erik Newman

Email: [enewman@ucsd.edu](mailto:enewman@ucsd.edu)

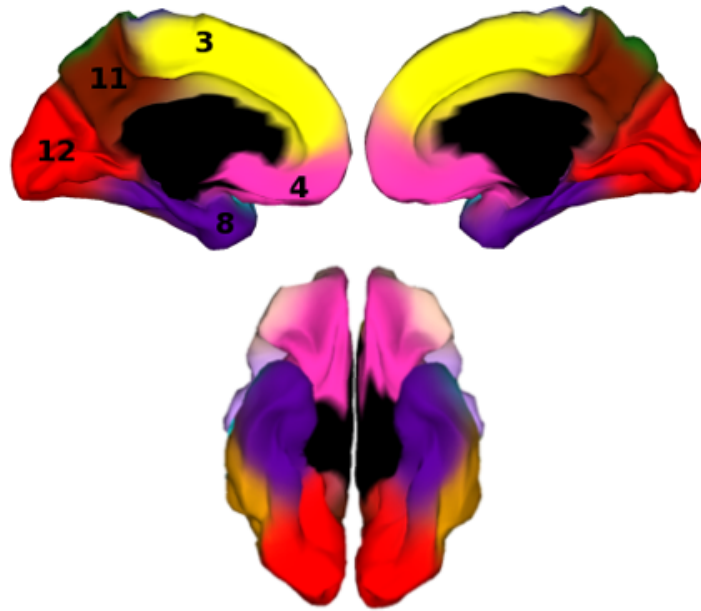

**Figure S1.** Adapted from Chen et al. 2012, defining genetically-informed cortical parcels. Medial and inferior views highlight the position of the ventromedial prefrontal cortex in pink (labeled “4”; originally labeled as orbitofrontal cortex in Chen et al, 2012). Other parcels annotated on the medial surface are 3, dorsomedial frontal cortex; 8, anteromedial temporal cortex; 11, precuneus; and 12, occipital cortex.

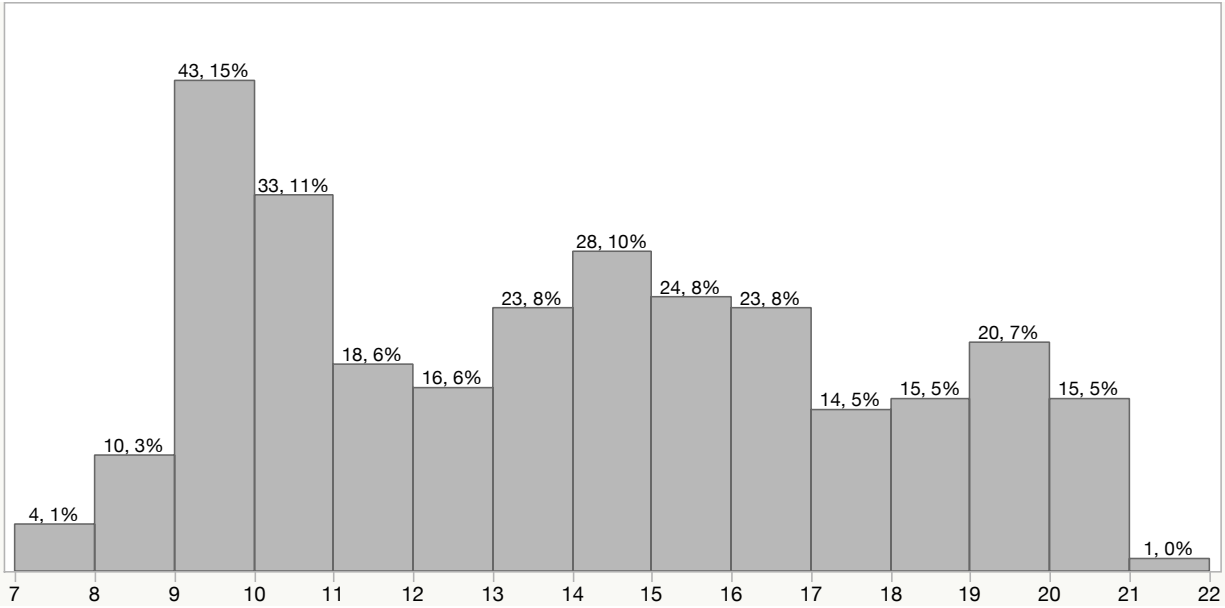

**Figure S2.** Distribution of age at imaging for the current sample. For each age, the number of subjects is shown along with the percentage of the overall sample.

**Table S1.** Regression model predicting anxiety from VMPFC thickness

| Term                           | <i>B</i>              | <i>SE</i>            | <i>t</i>            | <i>p</i>             |
|--------------------------------|-----------------------|----------------------|---------------------|----------------------|
| Age                            | 0.0915                | 0.0966               | 0.95                | 0.3444               |
| <b><i>Gender</i></b>           | <b><i>0.9477</i></b>  | <b><i>0.3137</i></b> | <b><i>3.02</i></b>  | <b><i>0.0028</i></b> |
| Age x Gender                   | 0.1295                | 0.0869               | 1.49                | 0.1374               |
| <b><i>VMPFC Thickness</i></b>  | <b><i>-7.2819</i></b> | <b><i>2.7362</i></b> | <b><i>-2.66</i></b> | <b><i>0.0083</i></b> |
| VMPFC Thickness x Age          | 0.6261                | 0.6403               | 0.98                | 0.3291               |
| VMPFC Thickness x Gender       | 2.0232                | 2.5502               | 0.79                | 0.4283               |
| VMPFC Thickness x Age x Gender | 0.2861                | 0.6364               | 0.45                | 0.6534               |

VMPFC, ventromedial prefrontal cortex. Model controlled for scanner and GAFs.

Terms in bold and italics were significant at  $p < .01$ .

**Table S2.** Regression models predicting mean thickness and VMPFC expansion from anxiety

| Term                        | <i>B</i>              | <i>SE</i>             | <i>t</i>             | <i>p</i>                |
|-----------------------------|-----------------------|-----------------------|----------------------|-------------------------|
| <b>VMPFC Surface Area</b>   |                       |                       |                      |                         |
| <b><i>Age</i></b>           | <b><i>0.0015</i></b>  | <b><i>0.0004</i></b>  | <b><i>3.92</i></b>   | <b><i>0.0001</i></b>    |
| Gender                      | -0.0007               | 0.0015                | -0.43                | 0.6647                  |
| Age x Gender                | -5.23e-5              | 0.0003                | -0.15                | 0.8801                  |
| <b><i>Total Area</i></b>    | <b><i>2.75e-6</i></b> | <b><i>9.04e-8</i></b> | <b><i>30.46</i></b>  | <b><i>&lt;.0001</i></b> |
| <b><i>Anxiety</i></b>       | <b><i>-0.0009</i></b> | <b><i>0.0003</i></b>  | <b><i>-3.08</i></b>  | <b><i>0.0023</i></b>    |
| <b><i>Anxiety x Age</i></b> | <b><i>0.0002</i></b>  | <b><i>7.93e-5</i></b> | <b><i>2.50</i></b>   | <b><i>0.0132</i></b>    |
| Anxiety x Gender            | -0.0002               | 0.0003                | -0.95                | 0.3429                  |
| Anxiety x Age x Gender      | 4.19e-5               | 7.83e-5               | 0.54                 | 0.5928                  |
| <b>Mean Thickness</b>       |                       |                       |                      |                         |
| <b><i>Age</i></b>           | <b><i>-0.0244</i></b> | <b><i>0.0017</i></b>  | <b><i>-14.09</i></b> | <b><i>&lt;.0001</i></b> |
| Gender                      | -9.44e-5              | 0.0058                | -0.02                | 0.9871                  |
| Age x Gender                | -0.0004               | 0.0016                | -0.26                | 0.7976                  |
| <b><i>Anxiety</i></b>       | <b><i>-0.0052</i></b> | <b><i>0.0014</i></b>  | <b><i>-3.76</i></b>  | <b><i>0.0002</i></b>    |
| <b><i>Anxiety x Age</i></b> | <b><i>0.0008</i></b>  | <b><i>0.0004</i></b>  | <b><i>2.28</i></b>   | <b><i>0.0235</i></b>    |
| Anxiety x Gender            | 0.0017                | 0.0014                | 1.25                 | 0.2110                  |
| Anxiety x Age x Gender      | 9.97e-6               | 0.0004                | 0.03                 | 0.9779                  |

VMPFC, ventromedial prefrontal cortex. Both models controlled for scanner and GAFs.

Terms in bold and italics were significant at  $p < .01$  and terms in bold only were significant at  $p < .05$ .
